# Supplementary material for: Slower EEG alpha generation, synchronization and “flow”—possible biomarkers of cognitive impairment and neuropathology of minor stroke
Source: PeerJ. 2017 Sep 28;5:e3839. doi: 10.7717/peerj.3839 (PMC5623310; doi:10.7717/peerj.3839)
Supplement: Supplemental Information 8 [file peerj-05-3839-s008.xlsx]

## Sheet: alpha PPs 19 channels
	Alpha phase potentials
	19 channels
				Ctrl (n=11)
						Sub8AVG	Sub10AVG	Sub11AVG	Sub12AVG	Sub14AVG	Sub16AVG	Sub19AVG2	Sub20AVG	Sub22AVG	Sub26aAVG	Sub27AVG
	delta	1.1-4 Hz		Individual alpha range		8.1 - 12.6 Hz	8.5 - 12.7 Hz	8.1 - 13.5 Hz	8.2 - 13.0 Hz	8.1 - 12.9 Hz	8.1 - 12.2 Hz	6.0 - 13.0 Hz	7.4 - 11.2 Hz	8.1 - 12.0 Hz	8.2 - 11.4 Hz	7.8 - 12.9 Hz
	theta	4.1-8 Hz		ch1	Fp1	45.6487	165.892	23.5758	-169.266	50.1277	12.2607	3.3045	-173.796	69.6986	-177.378	173.481
	alpha	8.1-13 Hz		ch2	Fp2	135.352	149.781	28.7399	143.827	14.2825	-7.0308	-7.0211	175.363	-157.953	-147.965	-109.733
	beta	13.1-30 Hz		ch3	F3	130.532	129.553	15.8023	99.147	-13.6175	14.1243	-10.0468	-168.899	119.129	172.872	-174.214
	gamma	30.1-50 Hz		ch4	F4	108.74	155.337	16.7005	123.522	-119.104	-22.1804	-30.4521	162.425	-157.695	-159.206	-176.804
				ch5	C3	-26.0118	178.616	-61.7217	13.8452	-11.8815	16.4193	-10.9209	176.5	25.6046	-164.611	168.106
				ch6	C4	-99.2628	-71.5987	142.951	-90.9711	-49.0522	-28.7932	-44.682	-28.0647	-17.5101	146.14	167.886
				ch7	P3	-178.602	-140.22	-151.481	-112.982	-168.013	-172.047	-172.319	178.457	179.572	173.262	-172.879
				ch8	P4	-164.099	-96.4184	175.344	124.973	-163.176	-172.684	-174.962	159.824	-170.797	163.614	164.986
				ch9	O1	174.222	-168.776	-170.671	159.027	150.274	174.129	167.926	172.247	168.24	153.744	172.915
				ch10	O2	-177.848	-174.531	-179.405	171.052	169.715	-178.229	178.266	163.777	178.408	165.331	177.051
				ch11	F7	139.276	177.393	-32.3806	-175.621	147.102	54.0737	29.6939	174.292	140.762	-176.655	162.244
				ch12	F8	162.034	158.745	102.398	176.828	144.157	24.0048	75.8637	178.546	-173.553	173.739	-169.32
				ch13	T3	168.295	-178.647	-91.7473	-173.679	117.266	73.2481	76.1855	172.513	173.748	-173.046	-178.329
				ch14	T4	163.84	-165.75	151.031	178.705	-179.544	153.947	173.561	-177.404	-169.799	176.268	179.185
				ch15	T5	175.568	-168.822	-156.45	-172.814	-165.381	-165.933	159.853	-171.719	-162.333	-165.636	-179.755
				ch16	T6	-169.889	-165.532	-164.646	-160.768	-172.455	-177.699	176.397	174.994	-177.341	-166.6	-173.319
				ch17	Fz	-100.091	147.135	-7.5207	-164.168	-93.5983	-15.0024	-20.2593	-124.013	74.4107	-168.741	-129.542
				ch18	Cz	-110.642	-170.251	41.1213	0.4444	-151.655	-37.2617	-46.4857	-171.793	-117.582	-176.724	-131.614
				ch19	Pz	-158.589	173.065	176.207	-170.606	-148.456	-156.115	-150.912	-39.8131	-165.065	139.299	177.945
				Subacute Stroke (n=10)
						Sub6AVG	Sub9AVG	Sub13AVG	Sub17AVG	Sub18AVG	Sub23AVG	Sub24AVG	Sub28AVG	Sub30AVG	Sub33AVG
				Individual alpha range		7.2 - 13.0 Hz	8.1 - 12.3 Hz	8.1 - 12.9 Hz	5.8 - 13.8 Hz	6.0 - 12.0 Hz	8.0 - 12.8 Hz	7.7 - 12.6 Hz	8.4 - 12.4 Hz	7.9 - 11.8 Hz	7.9 - 10.8 Hz
				ch1	Fp1	135.459	14.6681	-65.8601	96.7812	-175.721	125.048	12.1881	-1.045	7.4113	-144.853
				ch2	Fp2	148.944	2.3603	117.246	49.2734	-173.792	149.503	4.0714	-18.5726	14.2373	164.756
				ch3	F3	83.4117	-1.9172	-82.1709	69.8206	-172.501	7.641	11.3331	-30.6681	11.2327	-166.93
				ch4	F4	-174.251	-1.1837	160.417	-47.0669	148.357	104.031	-8.6776	-51.128	11.7854	-177.715
				ch5	C3	-49.495	-31.3175	-114.295	-23.9927	-144.448	-129.343	-6.9305	-86.1156	2.9169	-109.952
				ch6	C4	128.196	-45.9371	4.7588	-166.987	98.9724	164.813	-56.731	-67.6222	-67.5561	8.4036
				ch7	P3	-153.2	-179.829	-160.342	-157.368	-177.114	142.524	-152.807	177.868	-145.68	172.329
				ch8	P4	-175.958	-178.993	-175.174	176.177	171.605	-177.15	-162.998	174.526	-175.638	-176.866
				ch9	O1	-165.239	-172.651	-176.691	-176.19	-177.787	-170.511	162.894	165.715	-165.751	157.657
				ch10	O2	-169.833	175.463	173.133	-158.054	-172.742	-178.721	175.598	168.288	-168.133	156.889
				ch11	F7	165.428	10.0271	149.015	-24.0827	-150.106	66.847	23.7386	27.7785	19.2131	-173.17
				ch12	F8	152.757	66.6518	113.159	177.331	121.753	-138.977	50.0412	29.2591	88.9374	178.266
				ch13	T3	-149.173	98.4239	169.307	-53.6565	-156.863	-142.794	74.079	130.371	-20.7359	-173.972
				ch14	T4	162.244	115.907	117.568	162.926	116.782	101.675	-29.4676	128.283	121.353	-178.003
				ch15	T5	-168.772	177.247	-171.397	-133.419	-175.134	-161.046	166.945	169.28	-169.902	168.992
				ch16	T6	178.823	-173.84	-163.67	172.236	146.931	-175.242	-168.383	-179.673	-179.487	-171.977
				ch17	Fz	171.876	-19.5506	-69.8516	110.068	-86.2819	36.2612	-1.2706	-47.1927	3.2375	-48.3661
				ch18	Cz	-113.694	-114.761	-127.399	47.0579	-171.264	142.13	-16.1901	-76.5117	-2.993	175.112
				ch19	Pz	162.513	-162.25	-177.073	-172.027	-164.132	-150.03	-149.36	-168.82	-177.738	-173.554
				Chronic Stroke (n=9)
						KSub6AVG	KSub9AVG	KSub13AVG	KSub17AVG	KSub23AVG	KSub24AVG	KSub28AVG	KSub30AVG	KSub33AVG
				Individual alpha range		8.2 - 11.5 Hz	8.4 - 10.8 Hz	8.2 - 11.4 Hz	8.0 - 10.9 Hz	8.6 - 12.0 Hz	8.5 - 11.3 Hz	8.2 - 13.0 Hz	8.3 - 11.4 Hz	8.1 - 11.3 Hz
				ch1	Fp1	-160.804	4.8883	111.997	86.115	43.2451	35.662	27.918	7.9356	-158.007
				ch2	Fp2	-142.478	7.7448	123.296	69.5343	25.6095	27.9903	17.6081	7.9673	-178.381
				ch3	F3	-174.243	-7.4727	-38.8164	130.026	38.7172	28.0542	-8.2129	20.2132	177.168
				ch4	F4	-151.43	-17.2545	107.834	148.835	17.8723	24.5382	28.6053	16.3976	145.041
				ch5	C3	1.0388	-13.1352	-76.2818	-32.5609	-6.7998	-125.367	-82.8897	24.0474	-37.0317
				ch6	C4	170.162	-46.6661	-2.0049	-129.656	-20.4355	-26.1684	-2.6138	38.2518	28.1419
				ch7	P3	66.3832	-178.195	-167.274	-140.387	-156.519	-161.757	-161.058	-170.787	-131.125
				ch8	P4	-148.517	177.575	-156.297	-170.442	-144.832	-176.2	165.967	-175.164	166.243
				ch9	O1	83.8024	170.057	-174.889	178.169	-178.043	-161.075	-176.284	-169.464	179.114
				ch10	O2	150.507	173.705	175.173	-176.687	-167.083	-177.778	177.136	-176.689	-175.77
				ch11	F7	143.004	10.4016	150.702	154.284	70.8143	27.1904	-6.1299	-22.247	-176.566
				ch12	F8	-174.109	63.7728	104.304	158.689	31.8803	19.3852	45.2148	34.726	170.578
				ch13	T3	152.947	30.537	171.967	174.862	-102.389	96.1995	-61.5192	-68.1802	-173.56
				ch14	T4	-172.986	143.413	163.766	178.76	-135.947	13.6457	77.1634	-103.582	168.006
				ch15	T5	165.973	-177.959	-170.618	-174.917	-168.779	-171.157	-176.273	-162.294	-176.659
				ch16	T6	-173.278	-179.56	-170.032	-171.088	-168.745	-179.885	172.51	-165.071	171.941
				ch17	Fz	-144.608	-22.9547	-89.3758	-11.9022	27.8737	28.1498	1.563	16.3432	-176.456
				ch18	Cz	-169.913	-74.035	-120.235	-91.6741	-13.012	-34.9278	-21.4726	26.8083	-177.009
				ch19	Pz	145.903	-156.313	-149.918	-160.221	-162.567	-160.128	-162.994	164.636	-173.041
