# Supplementary material for: Slower EEG alpha generation, synchronization and “flow”—possible biomarkers of cognitive impairment and neuropathology of minor stroke
Source: PeerJ. 2017 Sep 28;5:e3839. doi: 10.7717/peerj.3839 (PMC5623310; doi:10.7717/peerj.3839)
Supplement: Supplemental Information 9 [file peerj-05-3839-s009.xlsx]

## Sheet: Correlation Data
	Ctrl (n=11)
		Alpha AVG
		F3	F4	F7	F8	P3	P4	T5	T6	MoCA	MoCA-MIS
	Sub8	10.3738	10.3345	10.2926	10.3597	10.4534	10.3118	10.3001	10.35	30	15
	Sub10	10.5437	10.5544	10.5964	10.6297	10.6953	10.666	10.6481	10.612	26	13
	Sub11	10.8922	10.9237	10.8084	10.7035	10.8871	10.8467	10.8047	10.6945	28	15
	Sub12	10.6103	10.5857	10.6235	10.6614	10.7323	10.6906	10.6589	10.6893	27	14
	Sub14	10.5775	10.5895	10.5437	10.4685	10.5314	10.522	10.3546	10.2648	25	12
	Sub16	10.3461	10.3442	10.1328	10.2465	10.1833	10.1833	9.9584	9.8769	26	12
	Sub19	10.1741	10.3939	10.2715	10.2885	10.1519	9.7969	9.8866	9.6456	28	13
	Sub20	10.4916	10.5945	10.4769	10.4541	10.6953	10.7606	10.7389	10.7558	18	9
	Sub22	10.2586	10.3151	10.1934	10.2213	10.1483	10.1131	10.0007	9.9605	23	8
	Sub26	10.7423	10.6709	10.5983	10.706	10.8731	10.8903	10.8262	10.8156	24	6
	Sub27	10.714	10.6799	10.5051	10.4729	10.6218	10.6351	10.4419	10.4711	27	14
	Average	10.5204	10.5442	10.4584	10.4738	10.543	10.4924	10.4199	10.376	25.6364	11.9091
	SD	0.218633	0.185458	0.209006	0.181486	0.276061	0.346726	0.348759	0.396245	3.20227	2.98176
	Subacute Stroke (n=10)
		Alpha AVG
		F3	F4	F7	F8	P3	P4	T5	T6	MoCA	MoCA-MIS
	Sub6	10.0065	10.2244	10.1702	10.0936	10.2679	10.1035	10.1532	10.0668	21	3
	Sub9	10.205	10.1898	10.3099	10.3381	10.0992	10.0723	10.188	10.1702	17	7
	Sub13	10.4019	10.4605	10.1627	10.2899	10.3385	10.455	10.1971	10.2618	25	8
	Sub17	10.0998	10.2746	10.2414	10.079	10.4419	9.9539	10.315	9.9663	17	13
	Sub18	9.8244	9.8149	9.9094	9.8286	9.6524	10.0232	9.876	9.9246	12	9
	Sub23	10.1612	10.2172	10.1728	10.1885	10.1842	10.1235	10.2342	10.2213	27	10
	Sub24	10.2453	10.146	10.3157	10.3277	10.0706	9.9734	10.1299	10.0363	16	12
	Sub28	10.2453	10.2129	10.2177	10.341	10.1338	10.1314	9.9454	10.0617	25	7
	Sub30	10.2039	10.1719	10.3057	10.1759	9.9868	9.7084	10.0472	9.6901	20	5
	Sub33	10.4848	10.5366	10.4942	10.5615	10.7082	10.6351	10.7412	10.6739	28	14
	Average	10.1878	10.2249	10.23	10.2224	10.1884	10.118	10.1827	10.1073	20.8	8.8
	SD	0.186963	0.192557	0.150445	0.198222	0.282071	0.259929	0.236809	0.257754	5.32917	3.52136
	Chronic Stroke (n=9)
		Alpha AVG
		F3	F4	F7	F8	P3	P4	T5	T6	MoCA	MoCA-MIS
	Sub6	9.9042	10.0152	10.0616	9.9469	10.0664	9.9811	10.0606	9.977	27	6
	Sub9	10.2076	10.2684	10.298	10.3693	10.1443	10.0596	10.2637	10.1336	24	9
	Sub13	10.2578	10.3326	9.9562	10.0912	10.1443	10.1893	9.9218	10.0005	24	10
	Sub17	10.6039	10.4377	10.5643	10.2732	10.6979	10.5912	10.607	10.4009	16	12
	Sub23	10.5313	10.4987	10.493	10.5214	10.4591	10.3885	10.4074	10.3391	29	13
	Sub24	10.3878	10.3529	10.3895	10.4277	10.3035	10.4572	10.3097	10.4657	19	13
	Sub28	10.6015	10.6385	10.4537	10.5464	10.5414	10.3566	10.1908	10.2188	26	9
	Sub30	10.2106	10.1642	10.2645	10.2015	10.0477	9.8534	10.0136	9.8011	17	5
	Sub33	10.5191	10.4625	10.4902	10.429	10.6527	10.6651	10.6557	10.6709	29	15
	Average	10.3582	10.3523	10.3301	10.3118	10.3397	10.2824	10.27	10.2231	23.4444	10.2222
	SD	0.233708	0.186824	0.207078	0.201531	0.254668	0.278896	0.254935	0.274016	4.97773	3.34581
